# Supplementary material
Source: PubMed Central journal article supplement (PMC3656453)
Supplement: supp_blood-2012-08-449272_Document1.pdf [file supp_blood-2012-08-449272_Document1.pdf]

**Table S1. Mendelian frequencies of Shp1 conditional KO mice**

| Genotype                                         | Total number of mice | Expected frequency | Actual frequency |
|--------------------------------------------------|----------------------|--------------------|------------------|
| <i>Ptpn6<sup>fl/fl</sup>;PF4-Cre<sup>+</sup></i> | 69                   | 25%                | 22%              |
| <i>Ptpn6<sup>fl/fl</sup>;PF4-Cre<sup>-</sup></i> | 105                  | 25%                | 34%              |
| <i>Ptpn6<sup>+/fl</sup>;PF4-Cre<sup>+</sup></i>  | 73                   | 25%                | 24%              |
| <i>Ptpn6<sup>+/fl</sup>;PF4-Cre<sup>-</sup></i>  | 61                   | 25%                | 20%              |

Data was collected from 12 breeding pairs (*Ptpn6<sup>fl/+</sup>;PF4-Cre<sup>+</sup>* × *Ptpn6<sup>fl/fl</sup>;PF4-Cre<sup>-</sup>*) and analysed using the  $\chi^2$  test ( $P < 0.01$ ).

**Table S2. Mendelian frequencies of Shp2 conditional KO mice**

| Genotype                                          | Total number of mice | Expected frequency | Actual frequency |
|---------------------------------------------------|----------------------|--------------------|------------------|
| <i>Ptpn11<sup>fl/fl</sup>;PF4-Cre<sup>+</sup></i> | 123                  | 50%                | 51%              |
| <i>Ptpn11<sup>fl/fl</sup>;PF4-Cre<sup>-</sup></i> | 116                  | 50%                | 49%              |

Data was collected from 10 breeding pairs (*Ptpn11<sup>fl/fl</sup>;PF4-Cre<sup>+</sup>* × *Ptpn11<sup>fl/fl</sup>;PF4-Cre<sup>-</sup>*).

**Table S3. Hematology of Shp1 conditional KO mice**

| Hematological parameters  | <i>Ptpn6<sup>fl/fl</sup>;PF4-Cre<sup>-</sup></i><br>(mean ± SEM; n = 36) | <i>Ptpn6<sup>fl/fl</sup>;PF4-Cre<sup>+</sup></i><br>(mean ± SEM; n = 37) |
|---------------------------|--------------------------------------------------------------------------|--------------------------------------------------------------------------|
| PLT (10 <sup>3</sup> /μL) | 888 ± 25                                                                 | 833 ± 27                                                                 |
| MPV (fL)                  | 5.70 ± 0.04                                                              | 6.03 ± 0.08**                                                            |
| RBC (10 <sup>6</sup> /μL) | 6.66 ± 0.10                                                              | 5.44 ± 0.21***                                                           |
| HCT (%)                   | 31.37 ± 0.56                                                             | 26.78 ± 0.60***                                                          |
| WBC (10 <sup>3</sup> /μL) | 3.34 ± 0.23                                                              | 3.94 ± 0.27                                                              |
| LYM (10 <sup>3</sup> /μL) | 2.67 ± 0.18                                                              | 2.81 ± 0.21                                                              |
| MON (10 <sup>3</sup> /μL) | 0.33 ± 0.04                                                              | 0.71 ± 0.037***                                                          |
| NEU (10 <sup>3</sup> /μL) | 0.34 ± 0.05                                                              | 0.22 ± 0.02*                                                             |
| EOS (10 <sup>3</sup> /μL) | 0.07 ± 0.03                                                              | 0.02 ± 0.004                                                             |
| BAS (10 <sup>3</sup> /μL) | 0.04 ± 0.02                                                              | 0.09 ± 0.02                                                              |

**Table S4. Hematology of Shp2 conditional KO mice**

| Hematological Parameters  | <i>Ptpn11<sup>fl/fl</sup>;PF4-Cre<sup>-</sup></i><br>(mean ± SEM; n = 39) | <i>Ptpn11<sup>fl/fl</sup>;PF4-Cre<sup>+</sup></i><br>(mean ± SEM; n = 43) |
|---------------------------|---------------------------------------------------------------------------|---------------------------------------------------------------------------|
| PLT (10 <sup>3</sup> /μL) | 853 ± 20                                                                  | 596 ± 18***                                                               |
| MPV (fL)                  | 5.70 ± 0.05                                                               | 6.63 ± 0.09***                                                            |
| RBC (10 <sup>6</sup> /μL) | 6.88 ± 0.08                                                               | 6.40 ± 0.13**                                                             |
| HCT (%)                   | 31.78 ± 0.48                                                              | 29.23 ± 0.64**                                                            |
| WBC (10 <sup>3</sup> /μL) | 3.53 ± 0.28                                                               | 4.09 ± 0.25                                                               |
| LYM (10 <sup>3</sup> /μL) | 2.96 ± 0.24                                                               | 3.37 ± 0.23                                                               |
| MON (10 <sup>3</sup> /μL) | 0.23 ± 0.03                                                               | 0.30 ± 0.05                                                               |
| NEU (10 <sup>3</sup> /μL) | 0.25 ± 0.03                                                               | 0.28 ± 0.02                                                               |
| EOS (10 <sup>3</sup> /μL) | 0.07 ± 0.03                                                               | 0.08 ± 0.03                                                               |
| BAS (10 <sup>3</sup> /μL) | 0.015 ± 0.005                                                             | 0.012 ± 0.003                                                             |

**Table S5. Hematology of Shp1/2 conditional DKO mice**

| Hematological parameters  | <i>Ptpn6<sup>fl/fl</sup>;Ptpn11<sup>fl/fl</sup>; PF4-Cre<sup>-</sup></i><br>(mean ± SEM; n = 7) | <i>Ptpn6<sup>fl/fl</sup>;Ptpn11<sup>fl/fl</sup>; PF4-Cre<sup>+</sup></i><br>(mean ± SEM; n = 11) |
|---------------------------|-------------------------------------------------------------------------------------------------|--------------------------------------------------------------------------------------------------|
| PLT (10 <sup>3</sup> /μL) | 849 ± 40                                                                                        | 62 ± 18***                                                                                       |
| MPV (fL)                  | 5.8 ± 0.23                                                                                      | 9.1 ± 0.33***                                                                                    |
| RBC (10 <sup>6</sup> /μL) | 6.73 ± 0.10                                                                                     | 4.95 ± 0.23***                                                                                   |
| HCT (%)                   | 32.7 ± 0.6                                                                                      | 25 ± 1.03***                                                                                     |
| WBC (10 <sup>3</sup> /μL) | 2.67 ± 0.39                                                                                     | 11.31 ± 1.22***                                                                                  |
| LYM (10 <sup>3</sup> /μL) | 2.33 ± 0.34                                                                                     | 8.72 ± 1.38**                                                                                    |
| MON (10 <sup>3</sup> /μL) | 0.23 ± 0.06                                                                                     | 1.13 ± 0.23**                                                                                    |
| NEU (10 <sup>3</sup> /μL) | 0.16 ± 0.03                                                                                     | 0.27 ± 0.04                                                                                      |
| EOS (10 <sup>3</sup> /μL) | 0.06 ± 0.002                                                                                    | 0.06 ± 0.002                                                                                     |
| BAS (10 <sup>3</sup> /μL) | 0.02 ± 0.01                                                                                     | 0.03 ± 0.008                                                                                     |

**Table S6. Platelet surface glycoprotein expression in whole blood of Shp1 KO mice**

| Surface glycoproteins | <i>Ptpn6<sup>fl/fl</sup>;PF4-Cre<sup>-</sup></i><br>(mean ± SEM; n = 7) | <i>Ptpn6<sup>fl/fl</sup>;PF4-Cre<sup>+</sup></i><br>(mean ± SEM; n = 9) |
|-----------------------|-------------------------------------------------------------------------|-------------------------------------------------------------------------|
| GPVI                  | 39.90 ± 2.06                                                            | 28.90 ± 1.97**                                                          |
| Integrin α2           | 34.46 ± 1.10                                                            | 29.08 ± 1.45*                                                           |
| Integrin αIIbβ3       | 383 ± 32.50                                                             | 340 ± 26.27                                                             |
| GPIbα                 | 66.51 ± 9.51                                                            | 96.50 ± 7.34*                                                           |
| CLEC-2                | 13.52 ± 1.56                                                            | 15.20 ± 1.65                                                            |
| G6b-B                 | 16.10 ± 0.57                                                            | 17.30 ± 0.92                                                            |
| ADAM10                | 18.50 ± 0.32                                                            | 20 ± 1.26                                                               |

**Table S7. Platelet surface glycoprotein expression in whole blood of Shp2 KO mice**

| Surface glycoproteins | <i>Ptpn11<sup>fl/fl</sup>;PF4-Cre<sup>-</sup></i><br>(mean ± SEM; n = 4-6) | <i>Ptpn11<sup>fl/fl</sup>;PF4-Cre<sup>+</sup></i><br>(mean ± SEM; n = 4-9) |
|-----------------------|----------------------------------------------------------------------------|----------------------------------------------------------------------------|
| GPVI                  | 38.32 ± 2.44                                                               | 35.28 ± 1.86                                                               |
| Integrin α2           | 31.87 ± 1.11                                                               | 32.98 ± 0.68                                                               |
| Integrin αIIbβ3       | 390 ± 47.39                                                                | 364 ± 12.84                                                                |
| GPIbα                 | 62 ± 14.14                                                                 | 66.70 ± 12.67                                                              |
| CLEC-2                | 14.39 ± 0.69                                                               | 18.65 ± 3.01                                                               |
| G6b-B                 | 14.32 ± 2.24                                                               | 13.68 ± 2.94                                                               |
| ADAM10                | 18.69 ± 2.53                                                               | 18.10 ± 1.69                                                               |

**Table S8. Platelet surface glycoprotein expression in whole blood of Shp1/2 DKO mice**

| Surface glycoproteins           | <i>Ptpn6<sup>fl/fl</sup>;Ptpn11<sup>fl/fl</sup>; PF4-Cre<sup>-</sup></i><br>(mean ± SEM; n = 4) | <i>Ptpn6<sup>fl/fl</sup>;Ptpn11<sup>fl/fl</sup>; PF4-Cre<sup>+</sup></i><br>(mean ± SEM; n = 5) |
|---------------------------------|-------------------------------------------------------------------------------------------------|-------------------------------------------------------------------------------------------------|
| GPVI                            | 49 ± 2.23                                                                                       | 0.91 ± 2.26***                                                                                  |
| Integrin $\alpha$ 2             | 3.44 ± 0.16                                                                                     | 0.96 ± 0.08***                                                                                  |
| Integrin $\alpha$ IIb $\beta$ 3 | 305 ± 16                                                                                        | 4.44 ± 2.90***                                                                                  |
| GPIb $\alpha$                   | 61 ± 15                                                                                         | 4.63 ± 1.50***                                                                                  |
| CLEC-2                          | 28 ± 4                                                                                          | 1.77 ± 0.70***                                                                                  |
| G6b-B                           | 16 ± 1.30                                                                                       | 2.93 ± 0.70***                                                                                  |
| ADAM10                          | 14 ± 0.31                                                                                       | 21.17 ± 1.13**                                                                                  |

**Table S9. Surface glycoprotein expression in Shp1 KO megakaryocytes**

| Surface glycoproteins           | <i>Ptpn6<sup>fl/fl</sup>;PF4-Cre<sup>-</sup></i><br>(mean ± SEM; n = 3) | <i>Ptpn6<sup>fl/fl</sup>;PF4-Cre<sup>+</sup></i><br>(mean ± SEM; n = 3) |
|---------------------------------|-------------------------------------------------------------------------|-------------------------------------------------------------------------|
| GPVI                            | 581 ± 36                                                                | 560 ± 42                                                                |
| Integrin $\alpha$ 2             | 189 ± 20                                                                | 177 ± 31                                                                |
| Integrin $\alpha$ IIb $\beta$ 3 | 1131 ± 77                                                               | 734 ± 40**                                                              |
| GPIb $\alpha$                   | 752 ± 38                                                                | 733 ± 60                                                                |

**Table S10. Surface glycoprotein expression in Shp2 KO megakaryocytes**

| Surface glycoproteins           | <i>Ptpn11<sup>fl/fl</sup>;PF4-Cre<sup>-</sup></i><br>(mean ± SEM; n = 3) | <i>Ptpn11<sup>fl/fl</sup>;PF4-Cre<sup>+</sup></i><br>(mean ± SEM; n = 3) |
|---------------------------------|--------------------------------------------------------------------------|--------------------------------------------------------------------------|
| GPVI                            | 650 ± 21                                                                 | 650 ± 33                                                                 |
| Integrin $\alpha$ 2             | 299 ± 20                                                                 | 241 ± 32                                                                 |
| Integrin $\alpha$ IIb $\beta$ 3 | 1026 ± 8                                                                 | 623 ± 83**                                                               |
| GPIb $\alpha$                   | 769 ± 56                                                                 | 436 ± 62*                                                                |

**Table S11. Mendelian frequencies of G6b conditional KO mice**

| Genotype                                       | Total number of mice | Expected frequency | Actual frequency |
|------------------------------------------------|----------------------|--------------------|------------------|
| <i>G6b<sup>fl/fl</sup>;PF4-Cre<sup>+</sup></i> | 121                  | 50%                | 54%              |
| <i>G6b<sup>fl/fl</sup>;PF4-Cre<sup>-</sup></i> | 105                  | 50%                | 46%              |

Data was collected from 10 breeding pairs (*G6b<sup>fl/fl</sup>;PF4-Cre<sup>+</sup>* × *G6b<sup>fl/fl</sup>;PF4-Cre<sup>-</sup>*).

**Table S12. Hematology of G6b conditional KO mice**

| Hematological parameter   | <i>G6b<sup>fl/fl</sup>;PF4-Cre<sup>-</sup></i><br>(mean ± SEM; n = 20) | <i>G6b<sup>fl/fl</sup>;PF4-Cre<sup>+</sup></i><br>(mean ± SEM; n = 35) |
|---------------------------|------------------------------------------------------------------------|------------------------------------------------------------------------|
| PLT (10 <sup>3</sup> /μL) | 884 ± 45                                                               | 116 ± 9***                                                             |
| MPV (fL)                  | 5.70 ± 0.06                                                            | 8.75 ± 0.09***                                                         |
| RBC (10 <sup>6</sup> /μL) | 6.18 ± 0.27                                                            | 5.98 ± 0.19                                                            |
| HCT (%)                   | 29.73 ± 0.73                                                           | 28.72 ± 0.47                                                           |
| WBC (10 <sup>3</sup> /μL) | 3.43 ± 0.35                                                            | 6.07 ± 0.48 **                                                         |
| LYM (10 <sup>3</sup> /μL) | 3.06 ± 0.33                                                            | 5.17 ± 0.40**                                                          |
| MON (10 <sup>3</sup> /μL) | 0.26 ± 0.05                                                            | 0.45 ± 0.04*                                                           |
| NEU (10 <sup>3</sup> /μL) | 0.17 ± 0.02                                                            | 0.39 ± 0.05**                                                          |
| EOS (10 <sup>3</sup> /μL) | 0.009 ± 0.003                                                          | 0.013 ± 0.003                                                          |
| BAS (10 <sup>3</sup> /μL) | 0.025 ± 0.008                                                          | 0.036 ± 0.014                                                          |

**Table S13. Platelet surface glycoprotein expression in whole blood of G6b KO mice**

| Surface glycoproteins | <i>G6b<sup>fl/fl</sup>;PF4-Cre<sup>-</sup></i><br>(mean ± SEM; n = 5) | <i>G6b<sup>fl/fl</sup>;PF4-Cre<sup>+</sup></i><br>(mean ± SEM; n = 5) |
|-----------------------|-----------------------------------------------------------------------|-----------------------------------------------------------------------|
| GPVI                  | 32 ± 4.23                                                             | 1.82 ± 0.26***                                                        |
| Integrin α2           | 3 ± 0.17                                                              | 0.63 ± 0.22***                                                        |
| Integrin αIIbβ3       | 235 ± 18                                                              | 68 ± 38.18**                                                          |
| GPIbα                 | 54 ± 5                                                                | 14 ± 6.22 **                                                          |
| CLEC-2                | 29 ± 1.70                                                             | 12 ± 0.60***                                                          |
| G6b-B                 | 15 ± 1.36                                                             | 1 ± 0.43***                                                           |
| ADAM10                | 15 ± 0.61                                                             | 24 ± 0.38***                                                          |

**Table S14. Surface glycoprotein expression in G6b KO megakaryocytes**

| Surface glycoproteins | <i>G6b<sup>fl/fl</sup>;PF4-Cre<sup>-</sup></i><br>(mean ± SEM; n = 4) | <i>G6b<sup>fl/fl</sup>;PF4-Cre<sup>+</sup></i><br>(mean ± SEM; n = 4) |
|-----------------------|-----------------------------------------------------------------------|-----------------------------------------------------------------------|
| GPVI                  | 714 ± 10                                                              | 217 ± 63**                                                            |
| Integrin α2           | 274 ± 41                                                              | 143 ± 27*                                                             |
| Integrin αIIbβ3       | 1147 ± 78                                                             | 1107 ± 38                                                             |
| GPIbα                 | 832 ± 10                                                              | 199 ± 42**                                                            |

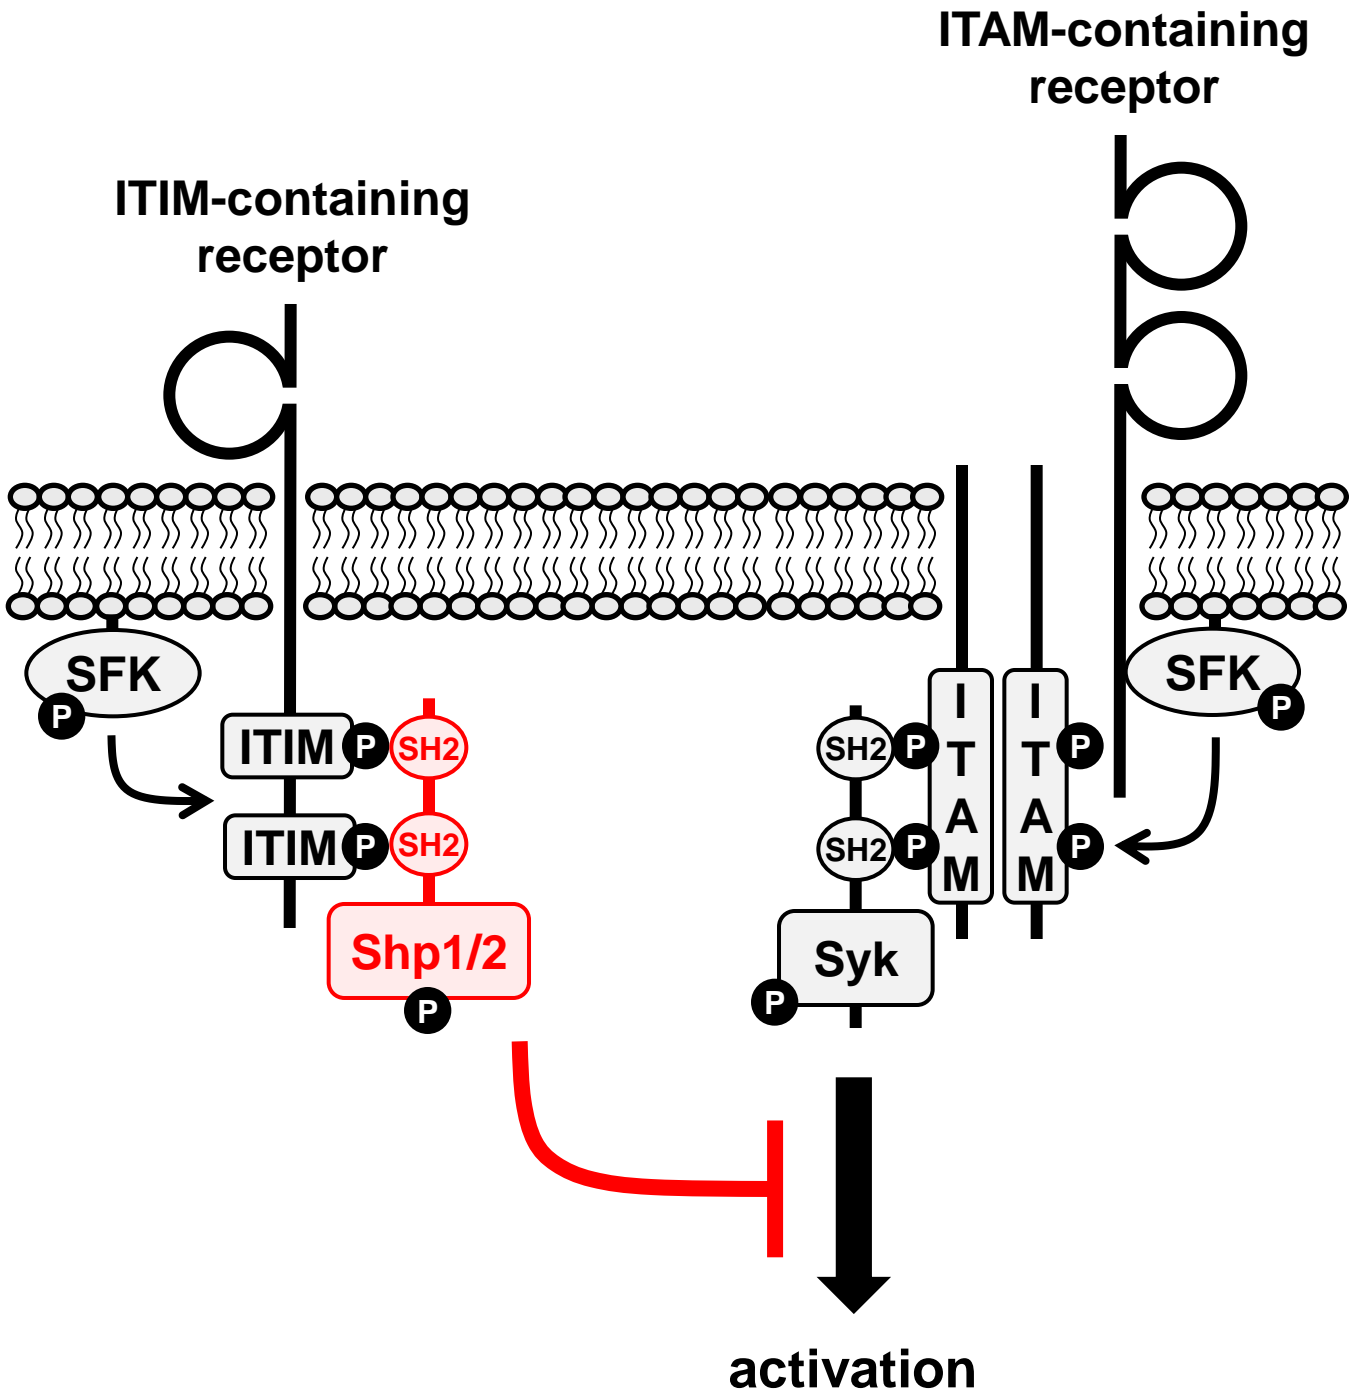

Figure S1A. Immunoreceptor tyrosine-based inhibition motif (ITIM)-containing receptors negatively regulate immunoreceptor tyrosine-based activation motif (ITAM)-containing receptors. SFK, Src family kinase.

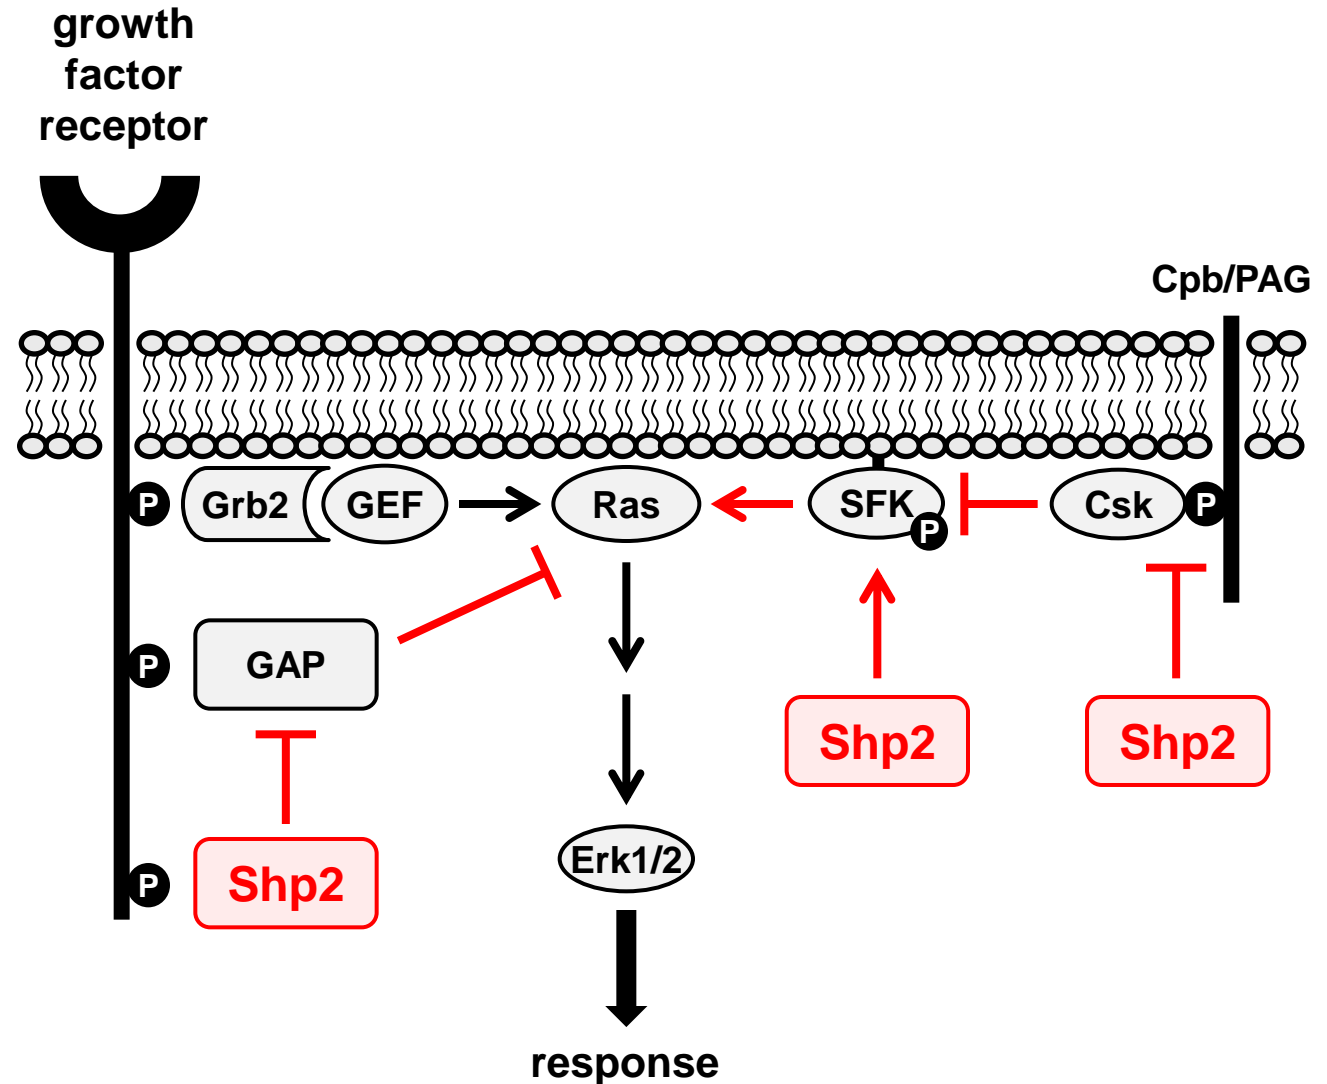

**Figure S1B. Potential mechanisms by which Shp2 positively regulates signaling via the Ras-Erk1/2 pathway.** SFK, Src family kinase; Csk, C-terminal Src kinase; Cpb/PAG, Csk-binding protein/phosphoprotein associated with glycosphingolipid-enriched microdomains; Grb2, Growth factor receptor-bound protein 2; GEF, Guanine nucleotide exchange factor; GAP, GTPase-activating protein.

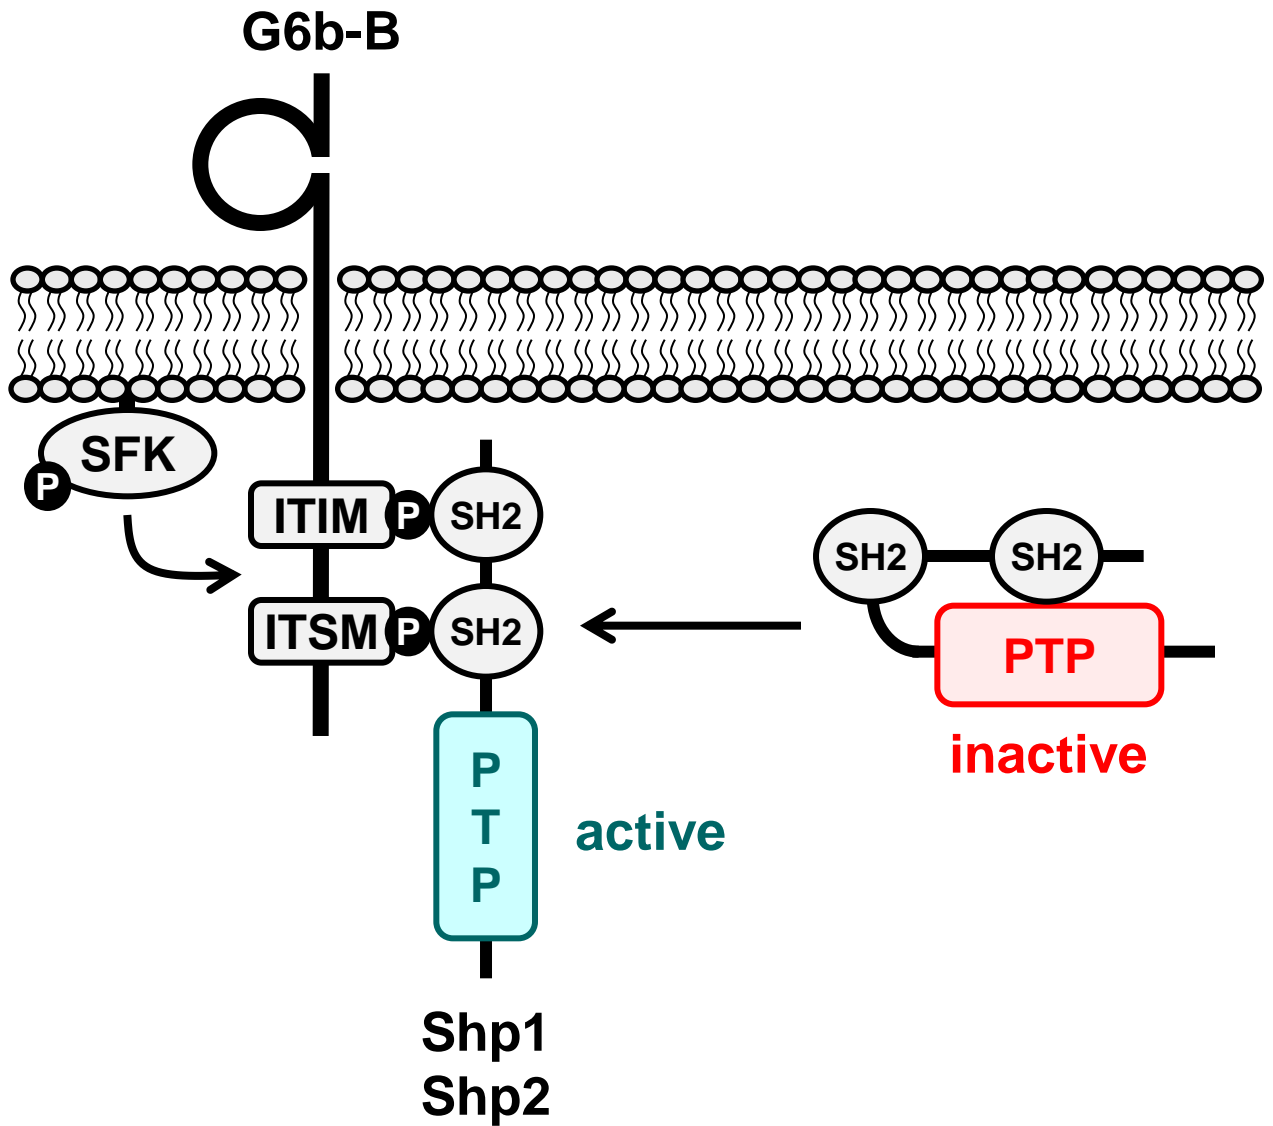

**Figure S1C.** G6b-B is constitutively tyrosine phosphorylated by Src family kinases and associated with Shp1 and Shp2. SFK, Src family kinase; ITIM, immunoreceptor tyrosine-based inhibition motif; ITSM, immunoreceptor tyrosine-based switch motif; PTP, protein-tyrosine phosphatase.

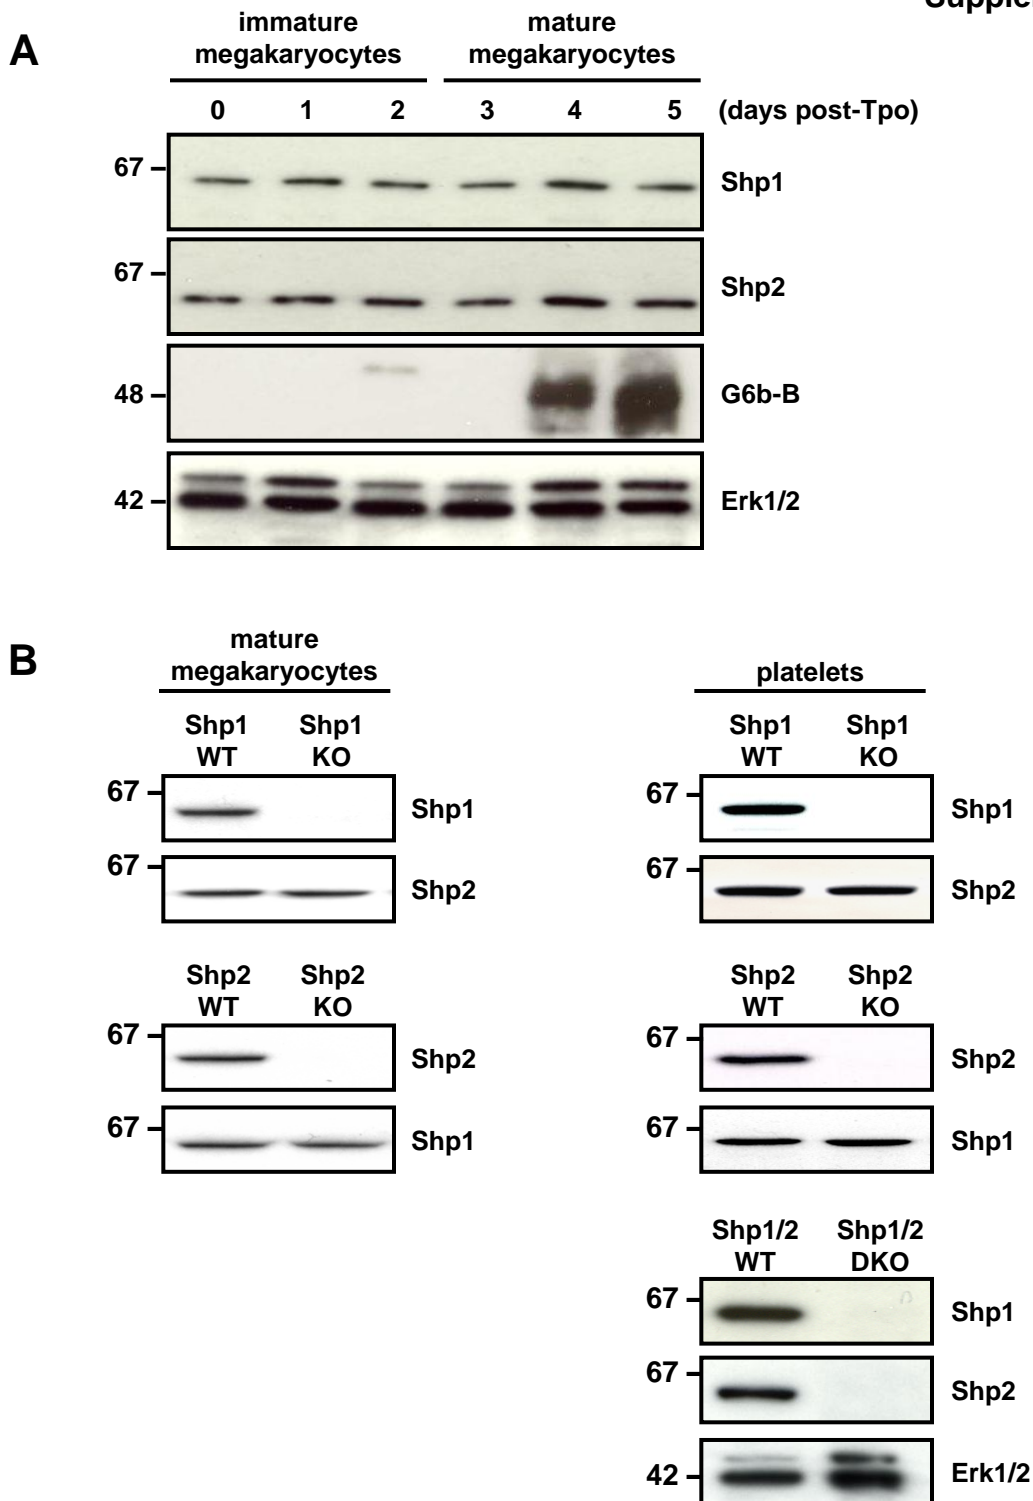

**Figure S2. Shp1 and Shp2 are expressed throughout megakaryocyte development.** (A) Whole cell lysates (WCLs) were prepared of bone marrow (BM) cells from wild-type (WT) mice 0-5 days post culture in the presence of thrombopoietin (Tpo) and western blotted for Shp1, Shp2, G6b-B and Erk1/2. (B) WCLs prepared of mature BM-derived megakaryocytes and washed platelets from *Ptpn6<sup>fl/fl</sup>;PF4-Cre<sup>+</sup>* (Shp1 KO), *Ptpn11<sup>fl/fl</sup>;PF4-Cre<sup>+</sup>* (Shp2 KO) and *Ptpn6<sup>fl/fl</sup>;Ptpn11<sup>fl/fl</sup>;PF4-Cre<sup>+</sup>* (Shp1/2 DKO) conditional KO mice and litter-matched WT mice (*Ptpn6<sup>fl/fl</sup>;PF4-Cre<sup>-</sup>* (Shp1 WT), *Ptpn11<sup>fl/fl</sup>;PF4-Cre<sup>-</sup>* (Shp2 WT) and *Ptpn6<sup>fl/fl</sup>;Ptpn11<sup>fl/fl</sup>;PF4-Cre<sup>-</sup>* (Shp1/2 WT)) were western blotted with Shp1, Shp2 and Erk1/2 antibodies. Representative blots from n = 3 independent experiments/genotype.



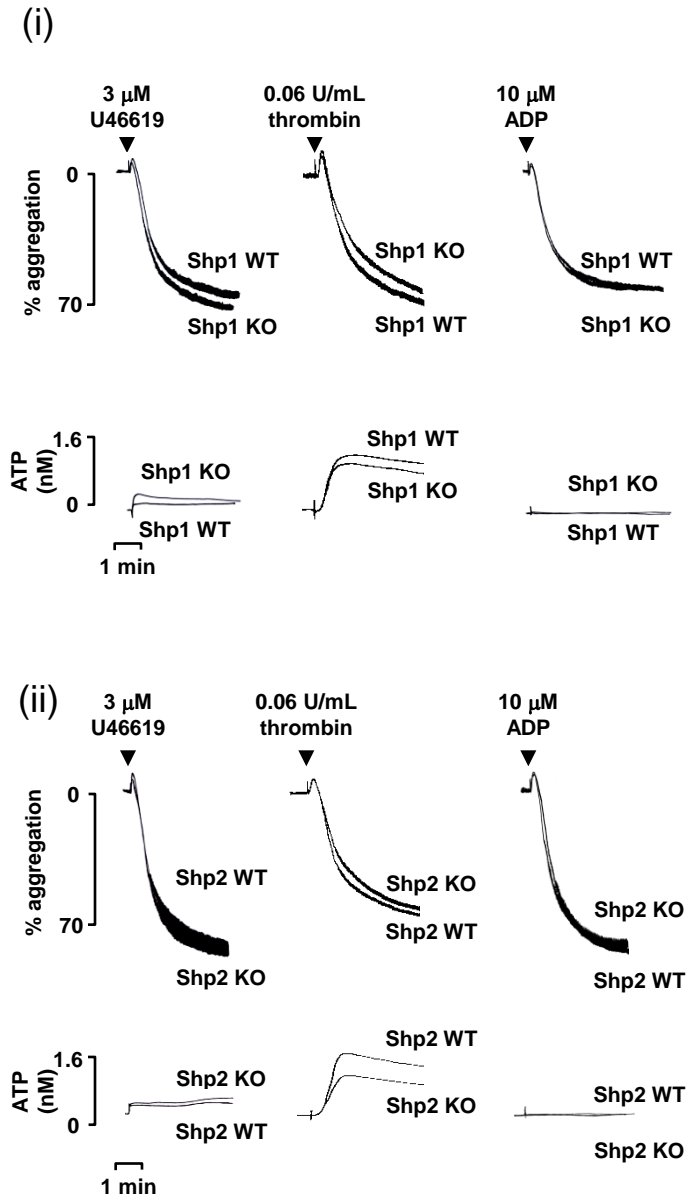

**Figure S3. Normal aggregation/ATP secretion of Shp1 and Shp2-deficient platelets in response to G protein-coupled receptor agonists.** Representative platelet aggregation and ATP secretion traces in response to agonists indicated of (i) Shp1 KO, and (ii) Shp2 KO platelets; n=4-8 mice/genotype/condition.

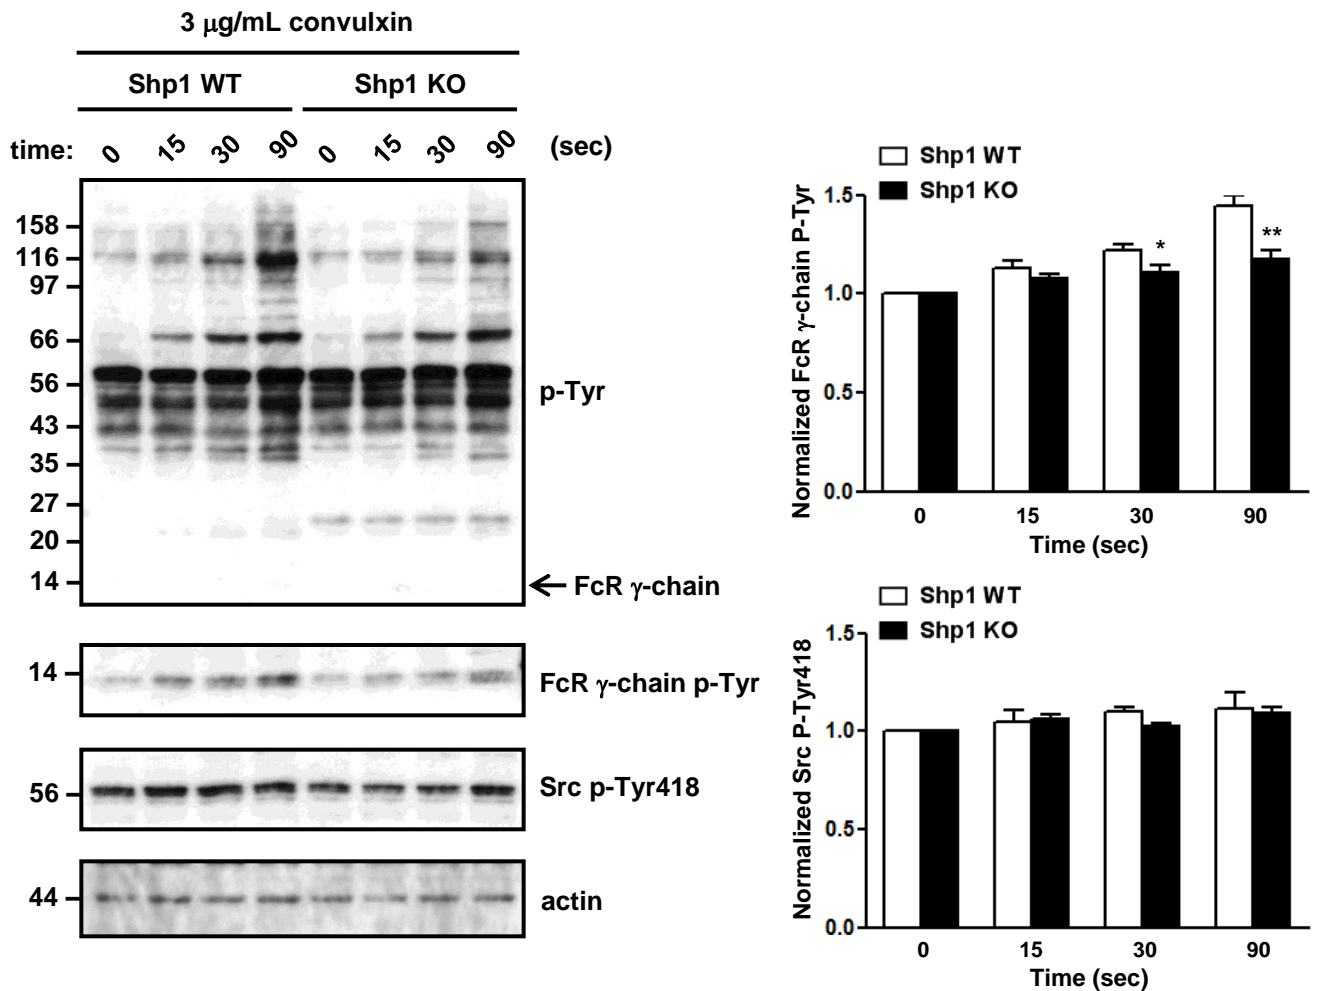

**Figure S4. Reduced GPVI-mediated tyrosine phosphorylation at early time points in Shp1-deficient platelets.** Whole cell lysates (WCLs) of resting and convulxin-stimulated platelets from *Ptpn6<sup>fl/fl</sup>;PF4-Cre<sup>+</sup>* (Shp1 KO) and litter-matched wild-type (*Ptpn6<sup>fl/fl</sup>;PF4-Cre<sup>-</sup>*, Shp1 WT) mice were western blotted with anti-phosphotyrosine (p-Tyr), and -Src-pTyr418 antibodies. Membranes were stripped and re-blotted with actin antibody. Representative blots and densitometry quantification from n=3-7 independent experiments/genotype (mean  $\pm$  SEM; \* $P < 0.05$ , \*\* $P < 0.01$ ).

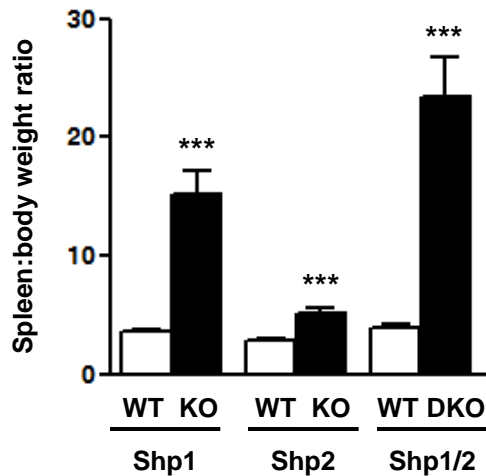

**Figure S5. Splenomegaly in Shp1, Shp2 and Shp1/2 conditional KO mice.** Splenomegaly is observed in megakaryocyte-specific *Ptpn6<sup>fl/fl</sup>;PF4-Cre<sup>+</sup>* (Shp1 KO), *Ptpn11<sup>fl/fl</sup>;PF4-Cre<sup>+</sup>* (Shp2 KO) and *Ptpn6<sup>fl/fl</sup>;Ptpn11<sup>fl/fl</sup>;PF4-Cre<sup>+</sup>* (Shp1/2 DKO) mice and corresponding litter matched wild-type (*Ptpn6<sup>fl/fl</sup>;PF4-Cre<sup>-</sup>* (Shp1 WT), *Ptpn11<sup>fl/fl</sup>;PF4-Cre<sup>-</sup>* (Shp2 WT) and *Ptpn6<sup>fl/fl</sup>; Ptpn11<sup>fl/fl</sup>;PF4-Cre<sup>-</sup>* (Shp1/2 WT)). Data are presented as spleen/body weight (mg/g) ratio (n = 10-20 mice/genotype; \*\*\**P* < 0.001).

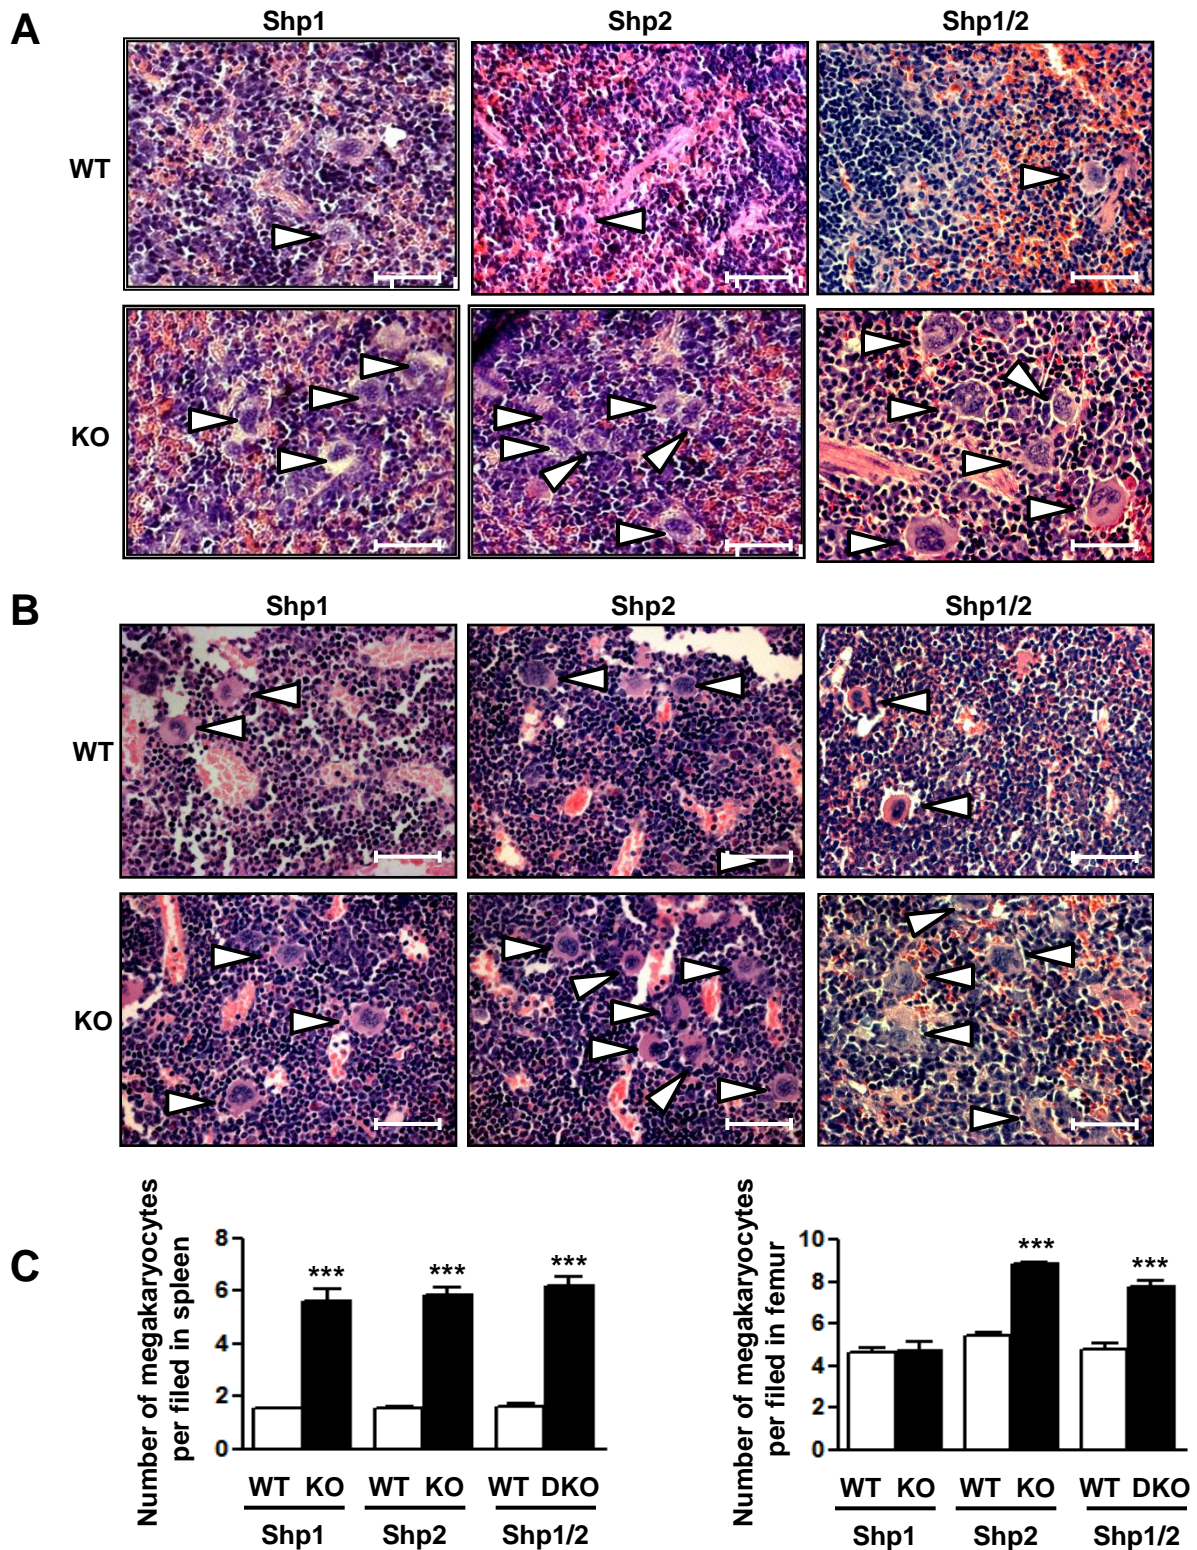

**Figure S6. Extramedullary hematopoiesis in Shp1, Shp2 and Shp1/2 conditional KO mice.** H&E-stained of (A) spleen and (B) femur sections from *Ptpn6<sup>fl/fl</sup>;PF4-Cre<sup>+</sup>* (Shp1 KO), *Ptpn11<sup>fl/fl</sup>;PF4-Cre<sup>+</sup>* (Shp2 KO), *Ptpn6<sup>fl/fl</sup>;Ptpn11<sup>fl/fl</sup>;PF4-Cre<sup>+</sup>* (Shp1/2 DKO) and corresponding litter matched wild-type (*Ptpn6<sup>fl/fl</sup>;PF4-Cre<sup>-</sup>* (Shp1 WT), *Ptpn11<sup>fl/fl</sup>;PF4-Cre<sup>-</sup>* (Shp2 WT), *Ptpn6<sup>fl/fl</sup>; Ptpn11<sup>fl/fl</sup>;PF4-Cre<sup>-</sup>* (Shp1/2 WT)). Representative images from n = 4 mice/genotype, 8-10 fields of view per tissue sample, through five marrow sections. Bright field images were obtained using a Zeiss Axiovert 200 inverted high-end microscope (Welwyn Garden City, UK) with a 20× objective. Arrowheads indicate megakaryocytes. (scale bar = 50 μm). (C) Quantification of the number of megakaryocytes per field, \*\*\**P* < 0.001.

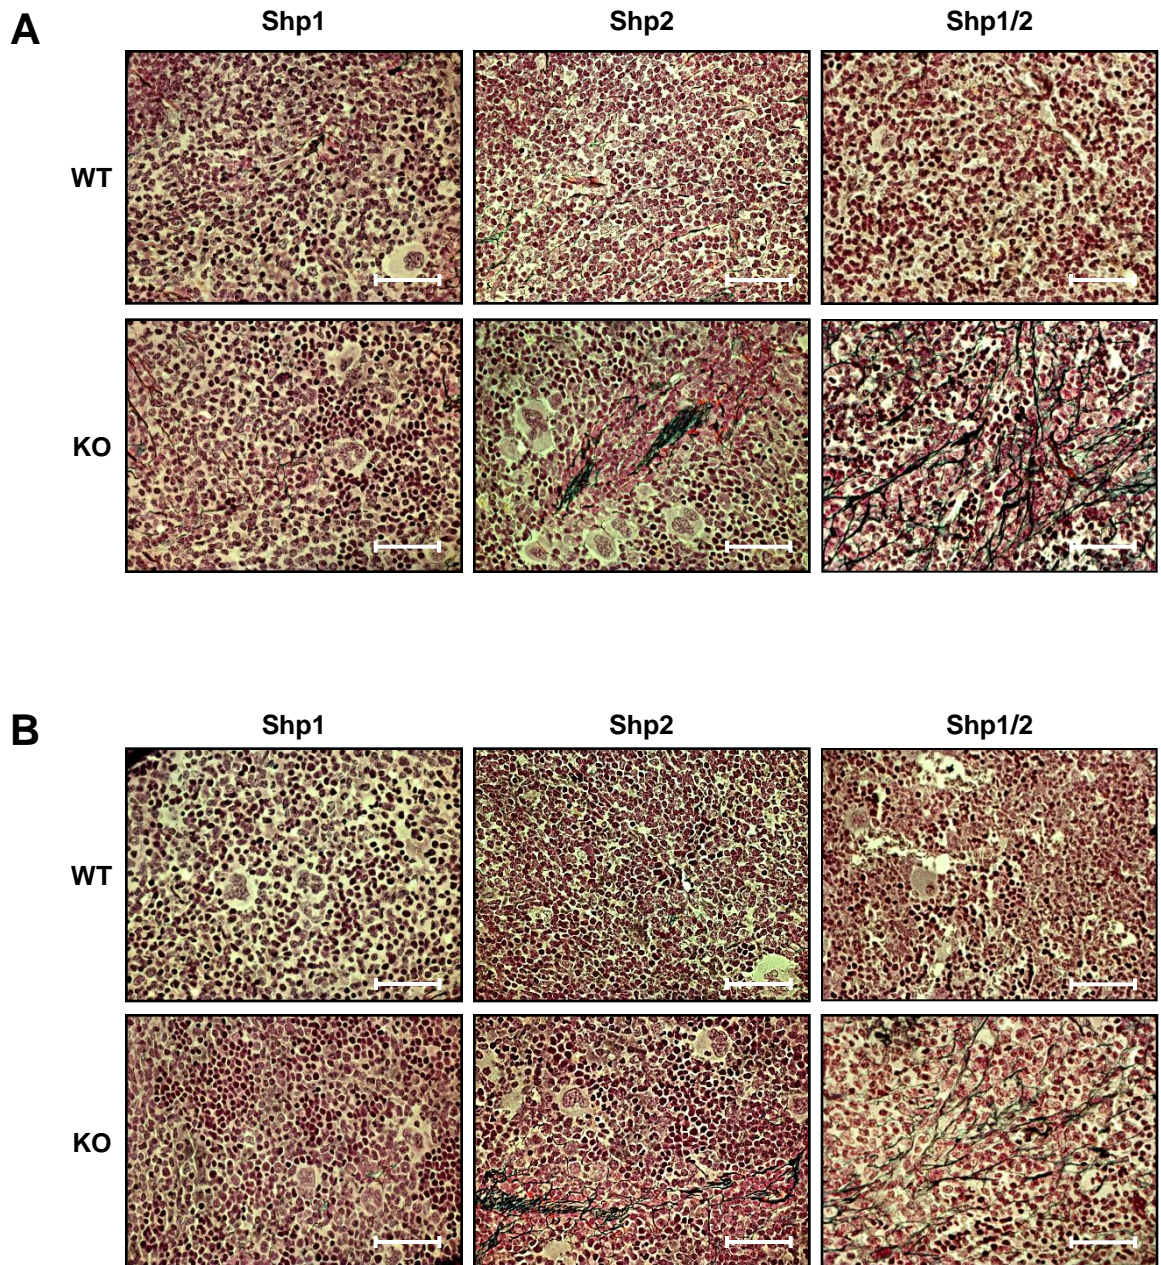

**Figure S7. Myelofibrosis in Shp2 and Shp1/2 conditional KO mice.** Reticulin-stained **(A)** spleen and **(B)** femur sections from *Ptpn6<sup>fl/fl</sup>;PF4-Cre<sup>+</sup>* (Shp1 KO), *Ptpn11<sup>fl/fl</sup>;PF4-Cre<sup>+</sup>* (Shp2 KO), *Ptpn6<sup>fl/fl</sup>;Ptpn11<sup>fl/fl</sup>;PF4-Cre<sup>+</sup>* (Shp1/2 DKO) and corresponding litter matched wild-type (*Ptpn6<sup>fl/fl</sup>;PF4-Cre<sup>-</sup>* (Shp1 WT), *Ptpn11<sup>fl/fl</sup>;PF4-Cre<sup>-</sup>* (Shp2 WT), *Ptpn6<sup>fl/fl</sup>; Ptpn11<sup>fl/fl</sup>;PF4-Cre<sup>-</sup>* (Shp1/2 WT)). Representative images from n = 4 mice/genotype, 8-10 fields of view per tissue sample, through five marrow sections. Bright field images were obtained using a Zeiss Axiovert 200 inverted high-end microscope (Welwyn Garden City, UK) with a 20× objective (scale bar = 50 μm).

A

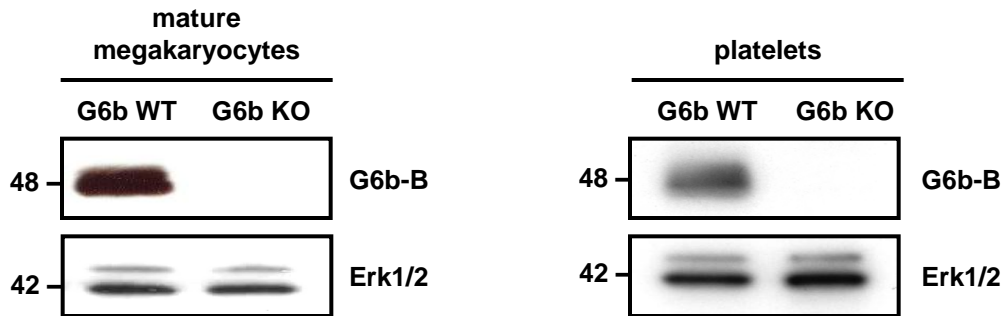

B

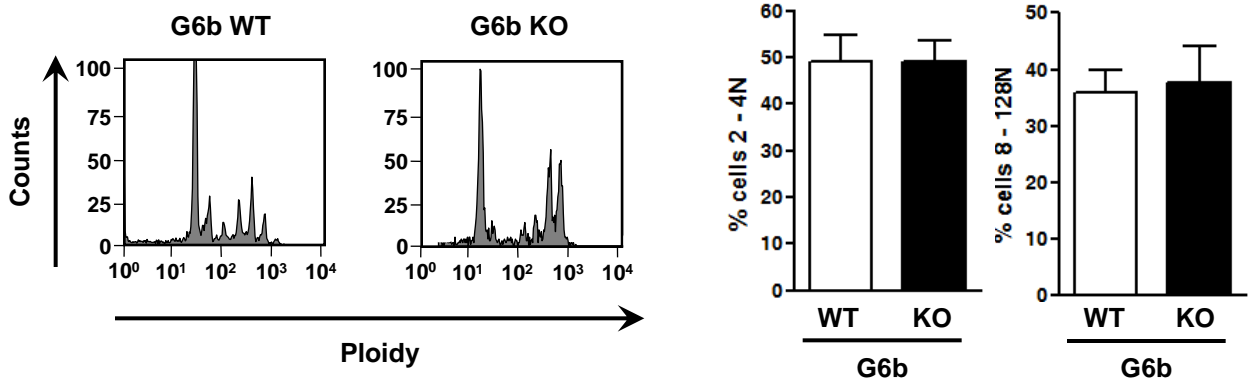

**Figure S8. G6b conditional KO mice partially phenocopy Shp1/2 conditional DKO mice.** (A) Whole cell lysates (WCLs) of washed platelets and cultured mature bone marrow (BM)-derived megakaryocytes from *G6b<sup>fl/fl</sup>;PF4-Cre<sup>+</sup>* (G6b KO) and litter-matched wild-type (*G6b<sup>fl/fl</sup>;PF4-Cre<sup>-</sup>*, G6b WT) mice were western blotted with anti-G6b-B and -Erk1/2 antibodies. (B) Ploidy of mature BM-derived megakaryocytes were quantified by propidium iodide staining and flow cytometry. Representative profiles are shown; n = 4-6 mice/genotype. The percentage of 2-4N and 8-128N ploidy cells was quantified. Mean  $\pm$  SEM; n = 4-6 mice/genotype.

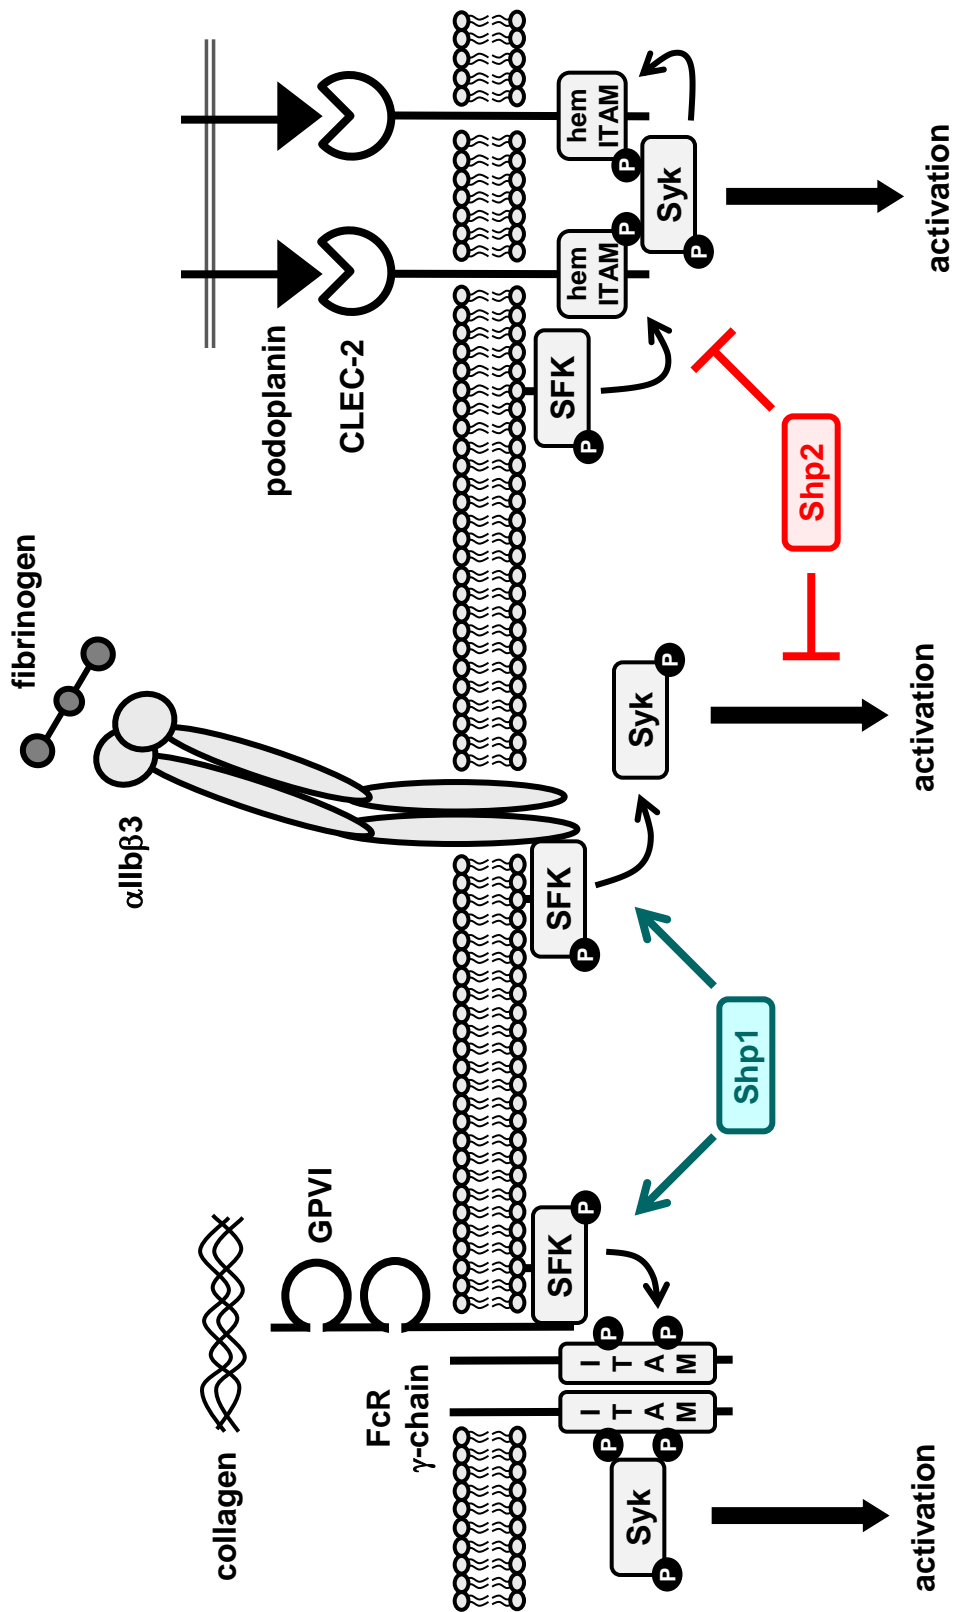

Figure S9. Distinct functions of Shp1 and Shp2 in platelets. SFK, Src family kinase; ITAM, immunoreceptor tyrosine-based activation motif.

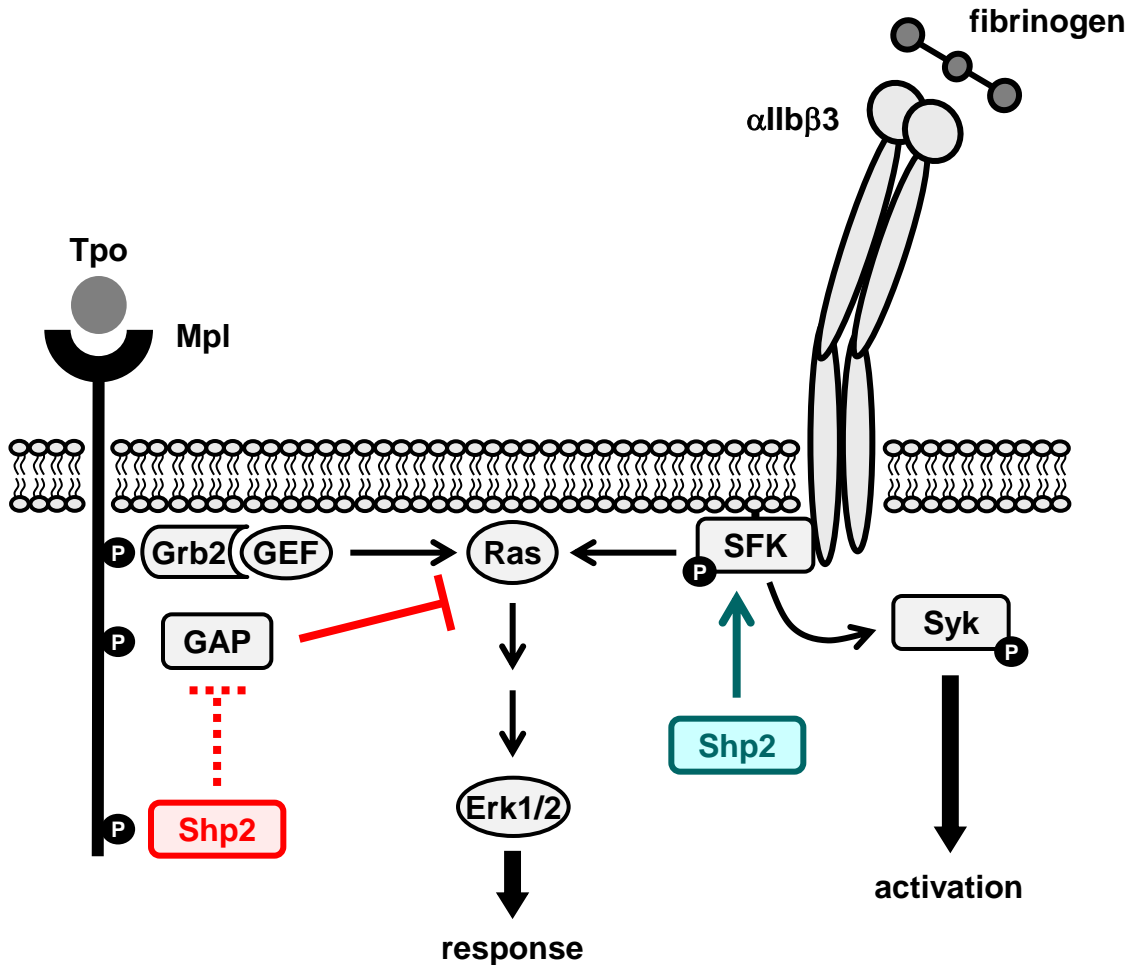

**Figure S10. Shp2 is a positive regulator of Mpl and integrin  $\alpha\text{IIb}\beta\text{3}$  signaling in megakaryocytes.** SFK, Src family kinase; ITAM, immunoreceptor tyrosine-based activation motif; Tpo, thrombopoietin; Grb2, Growth factor receptor-bound protein 2; GEF, Guanine nucleotide exchange factor; GAP, GTPase-activating protein.



## Supplementary Videos

**Fig2video1. Laser-induced thrombus formation in a *Ptpn6<sup>fl/fl</sup>;PF4-Cre<sup>-</sup>* (Shp1 WT) mouse.** Representative video of fluorescently-labelled platelets (green) accumulating at the site of laser-induced injury in an arteriole in the cremaster muscle of a Shp1 WT mouse. A timer is shown in the top left corner and a 10  $\mu\text{m}$  scale bar in the bottom left corner.

**Fig2video2. Laser-induced thrombus formation in a *Ptpn6<sup>fl/fl</sup>;PF4-Cre<sup>+</sup>* (Shp1 KO) mouse.** Representative video of fluorescently-labelled platelets (green) accumulating at the site of laser-induced injury in an arteriole in the cremaster muscle of a Shp1 KO mouse. A timer is shown in the top left corner and a 10  $\mu\text{m}$  scale bar in the bottom left corner.

**Fig2video3. Laser-induced thrombus formation in a *Ptpn11<sup>fl/fl</sup>;PF4-Cre<sup>-</sup>* (Shp2 WT) mouse.** Representative video of fluorescently-labelled platelets (green) accumulating at the site of laser-induced injury in an arteriole in the cremaster muscle of a Shp2 WT mouse. A timer is shown in the top left corner and a 10  $\mu\text{m}$  scale bar in the bottom left corner.

**Fig2video4. Laser-induced thrombus formation in a *Ptpn11<sup>fl/fl</sup>;PF4-Cre<sup>+</sup>* (Shp2 KO) mouse.** Representative video of fluorescently-labelled platelets (green) accumulating at the site of laser-induced injury in an arteriole in the cremaster muscle of a Shp2 KO mouse. A timer is shown in the top left corner and a 10  $\mu\text{m}$  scale bar in the bottom left corner.
